# Supplementary material for: Chasing the signaling run by tri-molecular time-lapse FRET microscopy
Source: PubMed Central journal article supplement (PMC5864757; doi:10.1038/s41420-018-0047-4), 2018-03-22
Supplement: 41420_2018_47_MOESM1_ESM.pdf [file 41420_2018_47_MOESM1_ESM.pdf]

## Supplemental Material

### Chasing the signaling run by tri-molecular time-lapse FRET microscopy

Hsiang-Ling Kuo<sup>1</sup>, Pei-Chuan Ho<sup>1</sup>, Shenq-Shyang Huang<sup>1</sup>, Nan-Shan Chang<sup>1,2,3,4,5,\*</sup>

<sup>1</sup>Institute of Molecular Medicine, <sup>2</sup>Center of Infectious Disease and Signaling Research, <sup>3</sup>Advanced Optoelectronic Technology Center, National Cheng Kung University, Tainan, Taiwan, ROC; <sup>4</sup>Department of Neurochemistry, New York State Institute for Basic Research in Developmental Disabilities, Staten Island, NY, USA; <sup>5</sup>Graduate Institute of Biomedical Sciences, College of Medicine, China Medical University, Taichung, Taiwan, ROC.

**Correspondence to:** Nan-Shan Chang, email: [changns@mail.ncku.edu.tw](mailto:changns@mail.ncku.edu.tw)

**Keywords:** Signaling; FRET microscopy; WWOX; Hyal-2; Smad4

**Running title:** Run, signaling run!

## Supplemental Figures

**Figure S1.** Time-lapse FRET imaging for control vectors. COS7 cells were transiently overexpressed with ECFP and DsRed-monomer (**a**), or ECFP, EGFP and DsRed-monomer (**b**), and exposed to native hyaluronan (HAN) at 25  $\mu\text{g/ml}$  for FRET imaging at 37°C for 24 hr. The signals are at background levels.

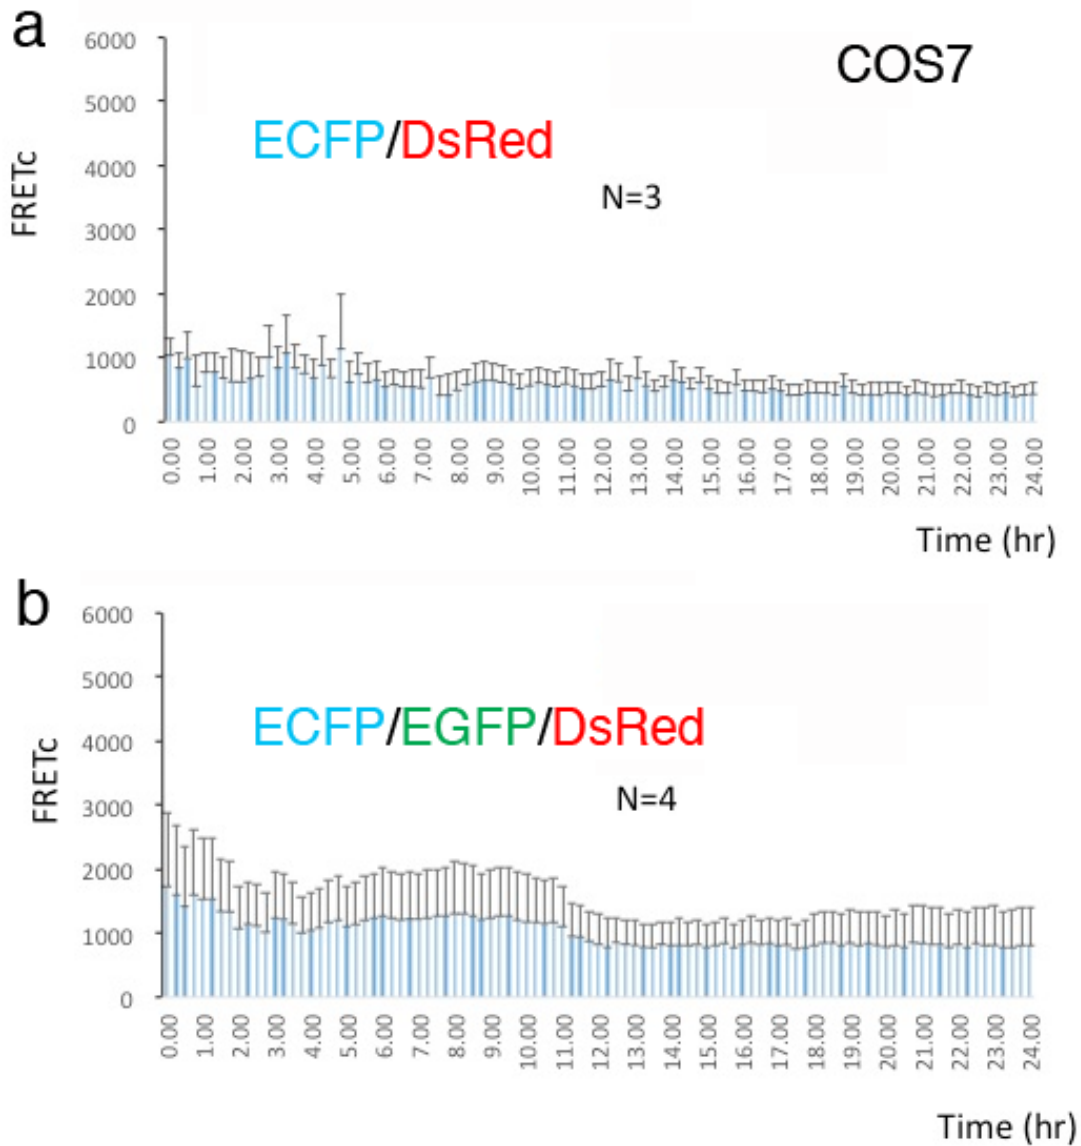

**Figure S2.** Time-lapse FRET imaging for control vectors. DU145 cells were transiently overexpressed with ECFP and DsRed-monomer (**a**), or ECFP, EGFP and DsRed-monomer (**b**), and exposed to native hyaluronan (HAN) at 25  $\mu\text{g/ml}$  for FRET imaging at 37°C for 24 hr. The signals are at background levels.

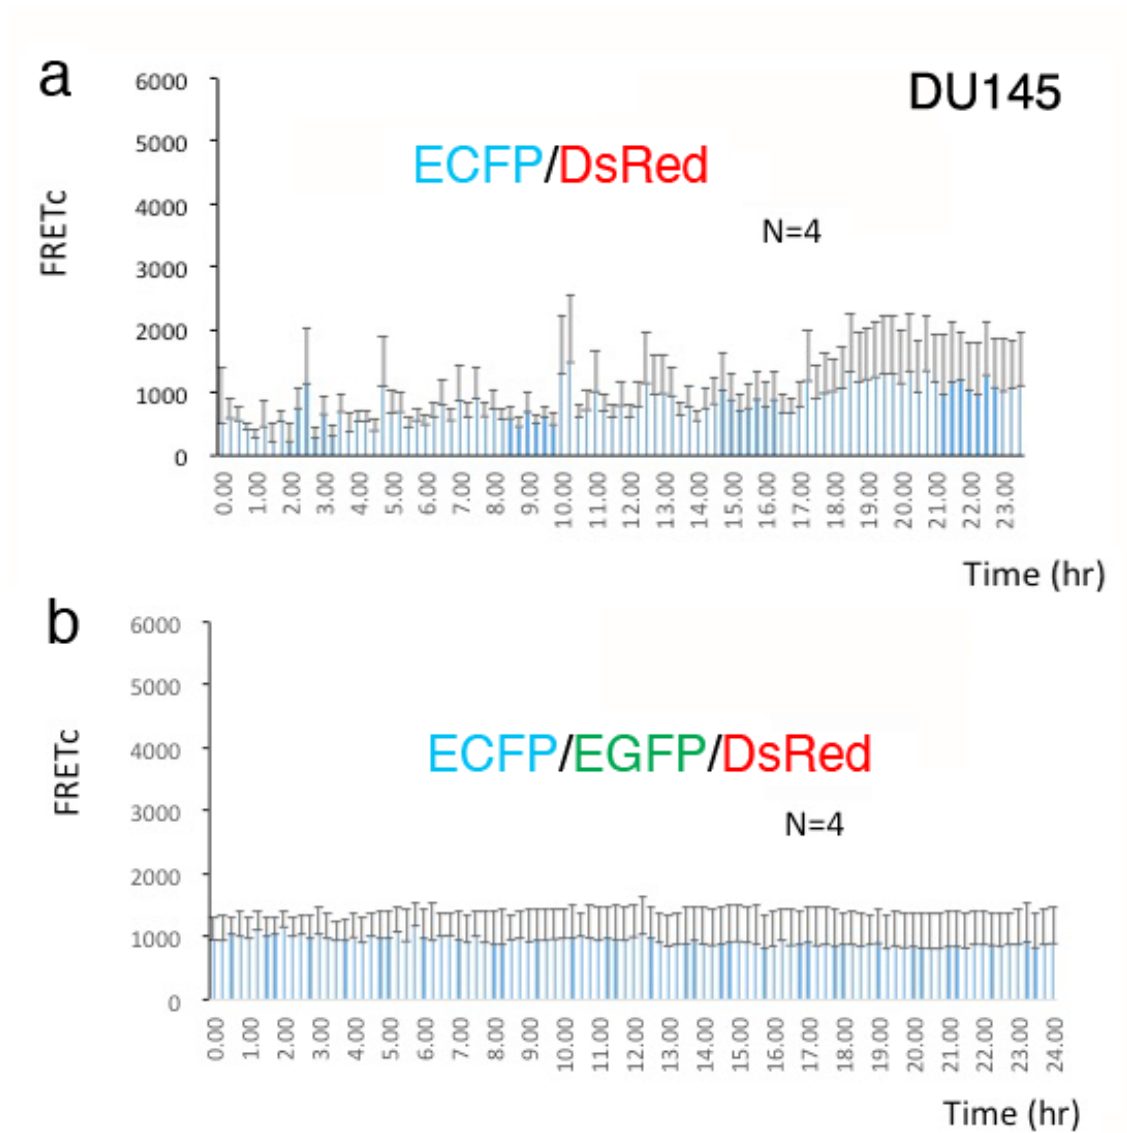

## Supplemental Videos

**Video S1.** Time-lapse FRET microscopy for the binding interactions of ECFP-I $\kappa$ B $\alpha$ , EGFP-ERK and DsRed monomer-WWOX under the influence of IoP in COS7 cells. (adapted from reference #13 with permissions)

**Video S2.** Time-lapse FRET analysis for the binding interactions of ECFP-I $\kappa$ B $\alpha$ , EGFP-dnERK and DsRed monomer-WWOX under the influence of IoP in COS7 cells. (adapted from reference #13 with permissions)

**Video S3.** Time-lapse FRET analysis for the binding interactions of ECFP-I $\kappa$ B $\alpha$ , EGFP-ERK and DsRed monomer-dnWWOX under the influence of IoP in COS7 cells. (adapted from reference #13 with permissions)

**Video S4.** Time-lapse FRET analysis for the Smad4/Hyal-2(-sp)/WWOX signaling in DU145 cells. A merged video of FRETc and bright field is shown. (adapted from reference #14 with permissions)

**Video S5.** Time-lapse FRET analysis for the Smad4/WWOX/p53 signaling in DU145 cells. A merged video of FRETc and bright field is shown. False positive signals are due to floating dead cells, which may be seen in other videos. (adapted from reference #14 with permissions)

**Video S6.** TGF- $\beta$ 1-mediated TIAF1 self-aggregation and apoptosis. Lung NCI-H1299 cancer cells were transiently overexpressed with EYFP-TIAF1, followed by stimulating with TGF- $\beta$ 1 (5 ng/ml). By time-lapse microscopy, aggregation of TIAF1 occurred in less than 60 min (see green punctates), followed by membrane blebbing at 180 min. (adapted from reference #31 with permissions)
